# Supplementary material
Source: PubMed Central journal article supplement (PMC2785276)
Supplement: 0908837106_0908837106SI.pdf [file 0908837106_0908837106SI.pdf]

# Supporting Information

Wu et al. 10.1073/pnas.0908837106

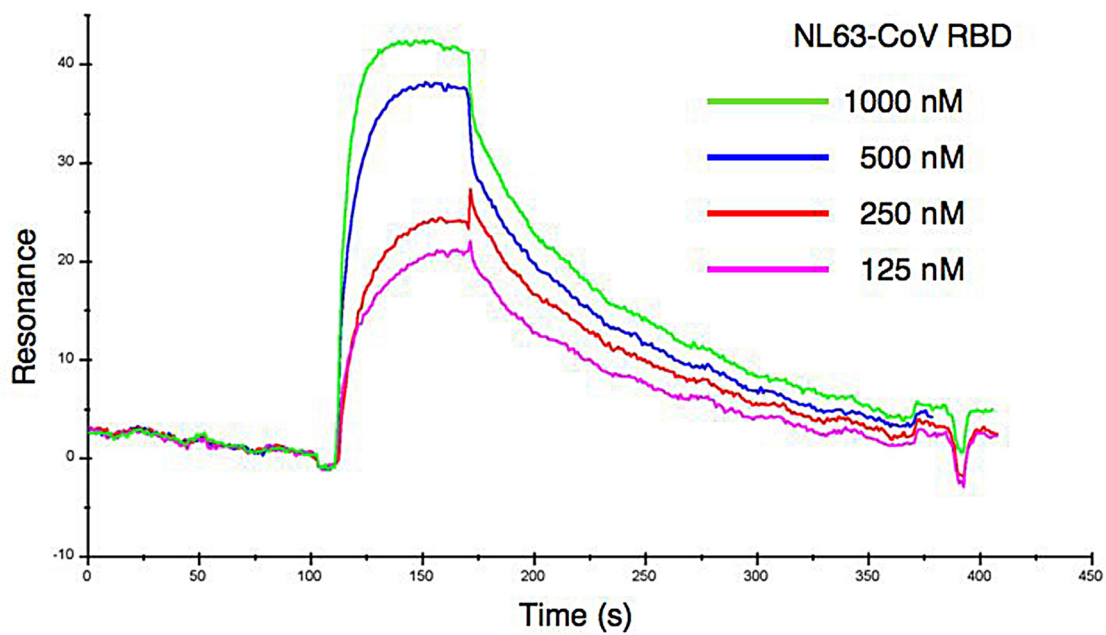

**Fig. S1.** Kinetics and binding affinity of NL63-CoV RBD and human ACE2 by surface plasmon resonance using Biacore. Human ACE2 was immobilized on a C5 sensor chip. NL63-CoV RBD was introduced at 20  $\mu\text{L}/\text{min}$  at the indicated concentrations. Kinetic parameters were determined with BIA-EVALUATIONS software and are shown in Fig. 1E.



**Table S1. Crystallographic data collection and refinement statistics**

| Data                                   |                                              |
|----------------------------------------|----------------------------------------------|
| Space group                            | P4 <sub>3</sub>                              |
| Cell constants (Å, °)                  | a = 77.9, b = 77.9, c = 631.6                |
| Resolution (Å)                         | 50–3.3                                       |
| Mosaicity (°)                          | 0.6                                          |
| R <sub>symm</sub> (last shell)         | 13.5% (68.7%)                                |
| Observed (unique) reflections          | 236,281 (54,947)                             |
| Redundancy (last shell)                | 4.3 (4.2)                                    |
| Completeness (last shell)              | 99.0% (98.5%)                                |
| I/s (last shell) 9.1 (2.6)             |                                              |
| Refinement                             |                                              |
| R <sub>work</sub> (R <sub>free</sub> ) | 27.6% (30.8%)                                |
| Correlation coefficient Fo-Fc          | 0.899                                        |
| Correlation coefficient Fo-Fc (free)   | 0.873                                        |
| R <sub>free</sub> reflections          | 5%                                           |
| <model B> (Å <sup>2</sup> )            | 47.3                                         |
| Bond lengths (Å) rms                   | 0.014                                        |
| Bond angles (°) rms                    | 1.694                                        |
| CHIRAL rms (Å <sup>3</sup> )           | 0.125                                        |
| Residues in each RBD                   | 110                                          |
| Residues in each ACE2                  | 596                                          |
| Glycans in each complex                | 9                                            |
| Ramachandran plot                      | 88.1% (core), 10.3% (allow), 1.6% (disallow) |

Data were collected at  $\lambda = 1.255 \text{ \AA}$  at APS beamline 19 ID.

$R_{\text{symm}} = \frac{\sum_{i,h} |I_{i,h} - \langle I_h \rangle|}{\sum_{i,h} I_{i,h}}$  where  $\langle I_h \rangle$  is the mean of the  $i$  observations of the reflection  $h$ .

$R_{\text{work}} = \frac{\sum ||F_o| - |F_c||}{\sum |F_o|}$ .  $R_{\text{free}}$  is the same statistic, but calculated from a subset of the data (5%) that has not been used using refinement.

X-ray diffraction data were processed using HKL2000 (1). Program CCP4 AMoRe was used to find the molecular replacement solutions (2). Program CCP4 dmmulti was used for the electron density averaging (3). Program O was used for model building (4). Programs CNS (5) and CCP4 remlcp (6) were used for structure refinement.

- Otwinowski Z, Minor W. (1997) Processing of x-ray diffraction data collection in oscillation mode. *Methods Enzymol* 276:307–326.
- Navaza J (2001) Implementation of molecular replacement in AMoRe. *Acta Crystallogr D Biol Crystallogr* 57(Pt 10):1367–1372.
- Cowtan K (1994) dm: An automated procedure for phase improvement by density modification. *Joint CCP4 and ESF-EACBM Newsletter Protein Crystallogr* 31:34–38.
- Jones TA, Zou JY, Cowan SW, Kjeldgaard (1991) Improved methods for building protein models in electron density maps and the location of errors in these models. *Acta Crystallogr A* 47(Pt 2):110–119.
- Brunger AT, et al. (1998) Crystallography & NMR system: A new software suite for macromolecular structure determination. *Acta Crystallogr D Biol Crystallogr* 54(Pt 5):905–921.
- Murshudov GN, Vagin AA, Lebedev A, Wilson KS, Dodson EJ (1999) Efficient anisotropic refinement of macromolecular structures using FFT. *Acta Crystallogr D Biol Crystallogr* 55(Pt 1):247–255.



**Table S3. ACE2 residues that directly contact NL63-CoV or SARS-CoV**

| ACE2 residues that contact both viruses | ACE2 residues that contact NL63-CoV only              | ACE2 residues that contact SARS-CoV only              |
|-----------------------------------------|-------------------------------------------------------|-------------------------------------------------------|
| H34, E37, Y41, Q325, N330, K353, G354   | D30, N33, P321, N322, M323, T324, G326,<br>D355, F356 | Q24, T27, K31, D38, L45, L79, M82, Y83,<br>Q325, E329 |
